# Supplementary material for: Characterization of Plasmodium falciparum and Plasmodium vivax recent exposure in an area of significantly decreased transmission intensity in Central Vietnam
Source: Springer Nature journal article supplement (doi:10.1186/s12936-018-2326-1), 2018-04-27
Supplement: MOESM1 [file 15725538]

## CART category for each antigen

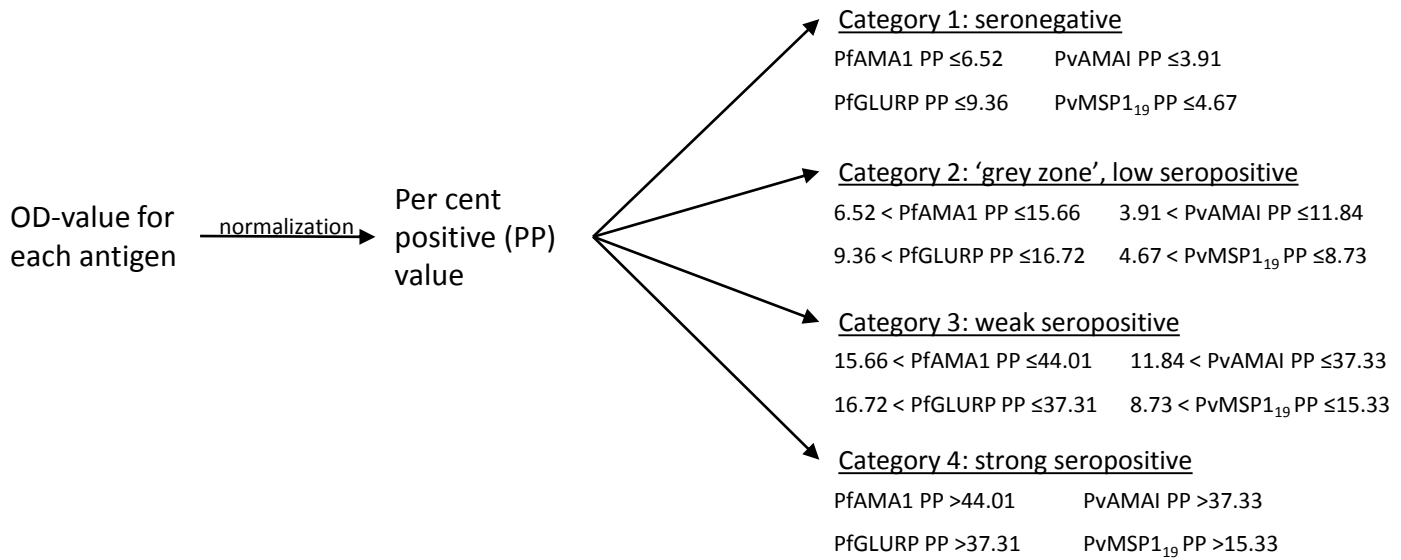

## Exposure definition for each antigen

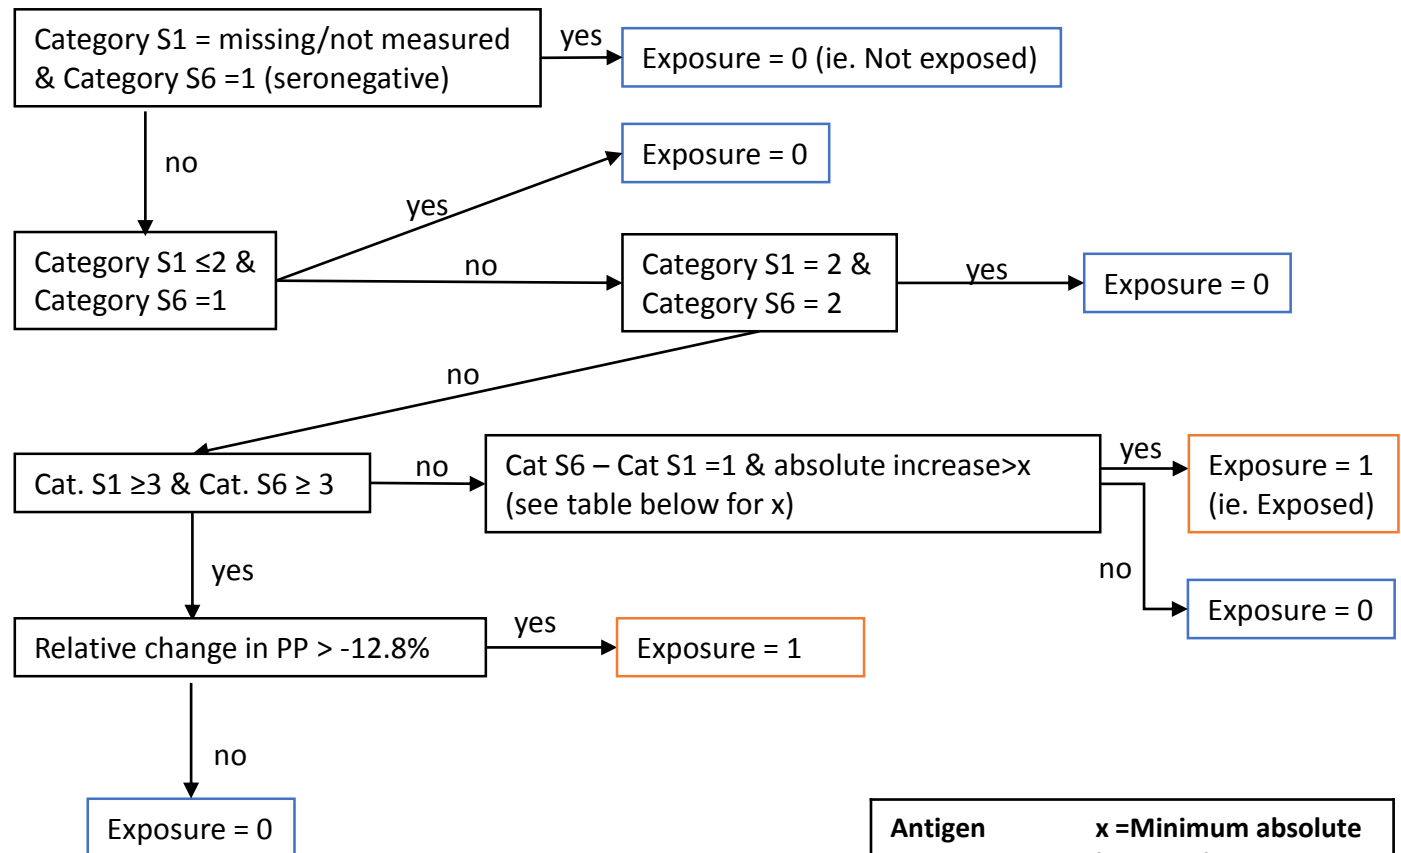

| Antigen              | x = Minimum absolute increase in PP |
|----------------------|-------------------------------------|
| PfAMA1               | 8.89                                |
| PfGLURP R2           | 3.58                                |
| PvAMA1               | 3.16                                |
| PvMSP1 <sub>19</sub> | 6.57                                |
