# Supplementary material for: Characterization of Plasmodium falciparum and Plasmodium vivax recent exposure in an area of significantly decreased transmission intensity in Central Vietnam
Source: Springer Nature journal article supplement (doi:10.1186/s12936-018-2326-1), 2018-04-27

## CART Categories per antigen and survey

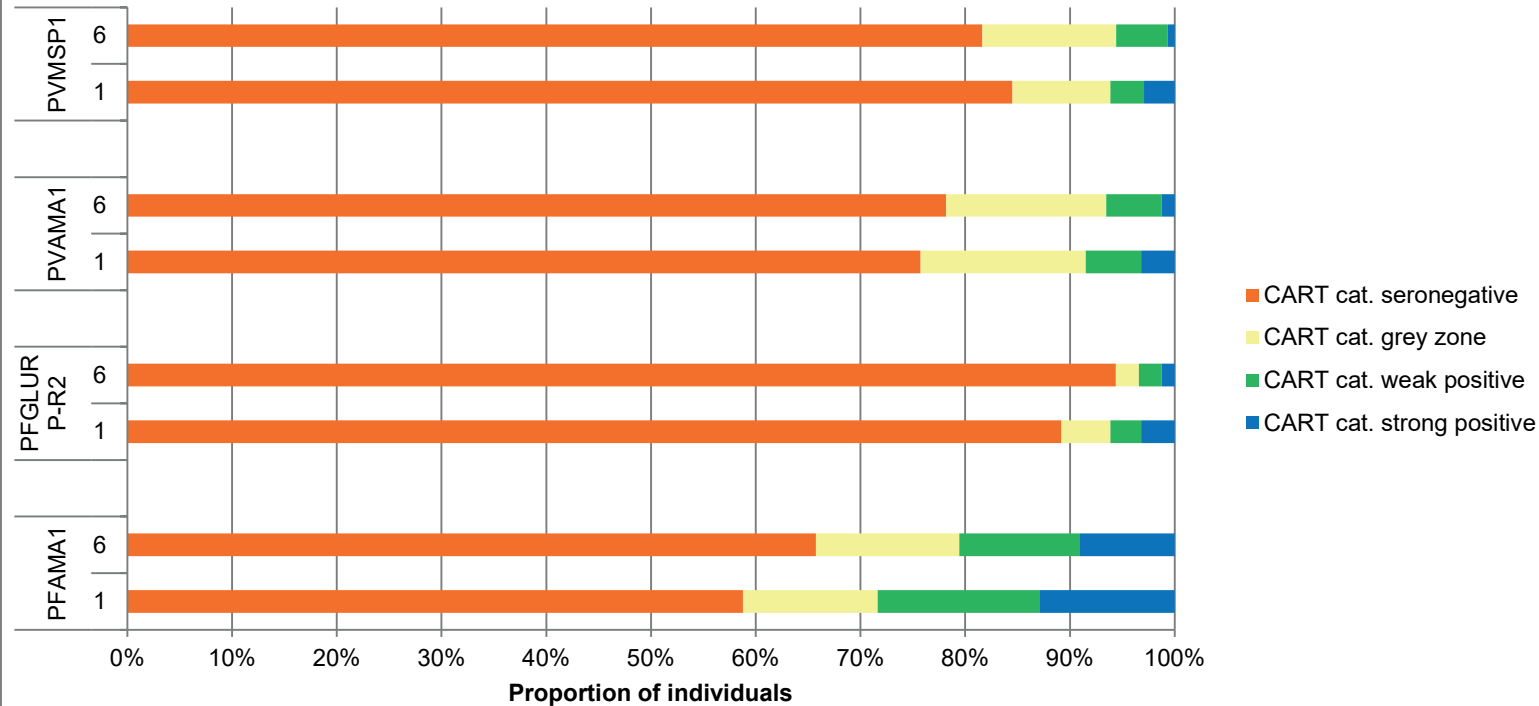

Supplement: MOESM5 [file 15725538]
